# Supplementary material
Source: PubMed Central journal article supplement (PMC3499840)
Supplement: hdy201248x1.pdf [file hdy201248x1.pdf]

**Table S1** Samples sequenced from undigested DNA for outlier loci *mk75*, *mk209* and *mk245* using outlier-specific internal primers. AFLP band score and sequence haplotypes from each sample are indicated. Dominant haplotypes from European ocellated lizards are highlighted in bold. Haplotype numbers are the same as in Figures S2-S4.

| Sample | Taxa                          | Country  | Location /population | <i>mk75</i> |                  | <i>mk209</i> |           | <i>mk245</i> |                 |
|--------|-------------------------------|----------|----------------------|-------------|------------------|--------------|-----------|--------------|-----------------|
|        |                               |          |                      | AFLP score  | Haplotype        | AFLP score   | Haplotype | AFLP score   | Haplotype       |
| LLI1   | <i>Lacerta lepida iberica</i> | Spain    | Galicia              | 1           | <b>H1</b>        | 0            | H6        | 0            | H8              |
| LLI2   | <i>Lacerta lepida iberica</i> | Spain    | Galicia              | 1           | <b>H1</b>        | 0            | H6        | 0            | H8              |
| LLI3   | <i>Lacerta lepida iberica</i> | Spain    | Galicia              | 0           | H2               | 0            | H3 and H6 | 0            | H8              |
| LLI4   | <i>Lacerta lepida iberica</i> | Portugal | Gerês                | 0           | H3               |              |           |              |                 |
| LLI5   | <i>Lacerta lepida iberica</i> | Portugal | Gerês                | 1           | <b>H1</b>        | 0            | H5        | 0            | H8              |
| LLI6   | <i>Lacerta lepida iberica</i> | Portugal | Gerês                | 1           | <b>H1</b>        | 0            | H6        | 0            | H8              |
| LLI7   | <i>Lacerta lepida iberica</i> | Portugal | Gerês                | 0           | H3               |              |           |              |                 |
| LLI8   | <i>Lacerta lepida iberica</i> | Portugal | Gerês                | 1           | <b>H1</b> and H3 | 0            | H7        | 0            | H8              |
| LLI9   | <i>Lacerta lepida iberica</i> | Portugal | Gerês                | 1           | <b>H1</b> and H2 |              |           |              |                 |
| LLL1   | <i>Lacerta lepida lepida</i>  | Portugal | Serra da Estrela     |             |                  | 0            | H6 and H7 | 0            | H3 and H5       |
| LLL2   | <i>Lacerta lepida lepida</i>  | Portugal | Serra da Estrela     | 1           | <b>H1</b> and H4 |              |           |              |                 |
| LLL3   | <i>Lacerta lepida lepida</i>  | Portugal | Serra da Estrela     |             |                  | 1            | H6        |              |                 |
| LLL4   | <i>Lacerta lepida lepida</i>  | Spain    | Béjar                | 1           | <b>H1</b> and H2 |              |           |              |                 |
| LLL5   | <i>Lacerta lepida lepida</i>  | Spain    | Béjar                | 0           | H2 and H9        | 0            | H6        | 0            | H8              |
| LLL6   | <i>Lacerta lepida lepida</i>  | Portugal | Peniche              |             |                  | 1            | H5 and H6 |              |                 |
| LLL7   | <i>Lacerta lepida lepida</i>  | Portugal | Alentejo             | 1           | <b>H1</b> and H3 |              |           |              |                 |
| LLL8   | <i>Lacerta lepida lepida</i>  | Portugal | Castro Marim         | 1           | <b>H1</b> and H8 |              |           |              |                 |
| LLL9   | <i>Lacerta lepida lepida</i>  | Portugal | Castro Marim         | 0           | H3 and H4        | 0            | H6        | 0            | H3 and H4       |
| LLL10  | <i>Lacerta lepida lepida</i>  | Portugal | Castro Marim         | 0           | H3 and H8        | 0            | H6        | 1            | <b>H1</b> nd H5 |
| LLL11  | <i>Lacerta lepida lepida</i>  | Portugal | Castro Marim         |             |                  | 1            | H5 and H6 |              |                 |
| LLL12  | <i>Lacerta lepida lepida</i>  | Spain    | Toledo               | 0           | H3               | 0            | H5 and H6 | 1            | <b>H1</b>       |
| LLL13  | <i>Lacerta lepida lepida</i>  | Spain    | Toledo               | 0           | H3 and H4        | 0            | H5 and H6 | 1            | <b>H1</b> nd H5 |

**Table S1** (continued)

| Sample | Taxa                             | Country  | Location /population | <i>mk75</i> |                  | <i>mk209</i> |                         | <i>mk245</i> |                   |
|--------|----------------------------------|----------|----------------------|-------------|------------------|--------------|-------------------------|--------------|-------------------|
|        |                                  |          |                      | AFLP score  | Haplotype        | AFLP score   | Haplotype               | AFLP score   | Haplotype         |
| LLL14  | <i>Lacerta lepida lepida</i>     | Spain    | Andalucia            | 1           | <b>H1</b> and H3 |              |                         |              |                   |
| LLL15  | <i>Lacerta lepida lepida</i>     | Spain    | Andalucia            | 0           | H2 and H7        | 0            | H4 and H5               | 1            | <b>H2</b> and H8  |
| LLL16  | <i>Lacerta lepida lepida</i>     | Spain    | Andalucia            | 0           | H4               | 0            | H5 and H6               | 1            | <b>H1</b> and H3  |
| LLN1   | <i>Lacerta lepida nevadensis</i> | Spain    | Almería              | 0           | H4 and H5        | 1            | <b>H2</b>               | 0            | H7 and H8         |
| LLN2   | <i>Lacerta lepida nevadensis</i> | Spain    | Almería              | 0           | H3 and H4        | 1            | <b>H1</b> and <b>H2</b> | 0            | H8                |
| LLN3   | <i>Lacerta lepida nevadensis</i> | Spain    | Almería              | 0           | H5 and H6        | 1            | <b>H2</b>               | 0            | H6 and H7         |
| LLN4   | <i>Lacerta lepida nevadensis</i> | Spain    | Almería              | 0           | H4 and H5        | 1            | <b>H1</b>               | 0            | H8 and H9         |
| LLN5   | <i>Lacerta lepida nevadensis</i> | Spain    | Almería              | 0           | H5 and H6        | 1            | <b>H1</b> and <b>H2</b> | 0            | H8                |
| LLN6   | <i>Lacerta lepida nevadensis</i> | Spain    | Almería              | 0           | H3 and H6        | 1            | <b>H1</b>               | 0            | H8                |
| LT1    | <i>Lacerta tangitana</i>         | Morocco  | Chefchaouen          | n.a.        | H10              | n.a.         | H8                      | n.a.         | <b>H2</b> and H12 |
| LT2    | <i>Lacerta tangitana</i>         | Morocco  | Azrou                | n.a.        | <b>H1</b> and H3 | n.a.         | H9                      | n.a.         | H8                |
| LT3    | <i>Lacerta tangitana</i>         | Morocco  | Azrou                | n.a.        | H10              | n.a.         | H10 and H11             | n.a.         | H10 and H12       |
| LT4    | <i>Lacerta tangitana</i>         | Morocco  | Azrou                | n.a.        | H10              | n.a.         | H10                     | n.a.         |                   |
| LT5    | <i>Lacerta tangitana</i>         | Morocco  | Azrou                | n.a.        | H10              | n.a.         | H12 and H13             | n.a.         |                   |
| LT6    | <i>Lacerta tangitana</i>         | Morocco  | Azrou                | n.a.        | H10              | n.a.         | H14 and H15             | n.a.         | <b>H2</b> and H13 |
| LT7    | <i>Lacerta tangitana</i>         | Morocco  | Azrou                | n.a.        | H10              | n.a.         | H15 and H16             | n.a.         |                   |
| LP1    | <i>Lacerta pater</i>             | Tunisia  | Tabarka              | 0           | H11              | 0            | H17                     | 0            | H17 and H18       |
| LP2    | <i>Lacerta pater</i>             | Tunisia  | Tabarka              | 0           | H10              | 0            | H18                     | 0            | H16 and H18       |
| LP3    | <i>Lacerta pater</i>             | Tunisia  | Tabarka              | 0           | H10              | 0            | H18                     | 1            | H15 and H16       |
|        | <i>Iberolacerta monticola</i>    | Portugal |                      | n.a.        | H12              | n.a.         | H19                     | n.a.         | H20               |
|        | <i>Lacerta schreiberi</i>        | Portugal |                      | n.a.        | H13              |              |                         | n.a.         | H19               |
|        | <i>Lacerta agilis</i>            | Spain    |                      | n.a.        | H14              |              |                         | n.a.         | H21               |
