# Supplementary material
Source: PubMed Central journal article supplement (PMC3499840)
Supplement: hdy201248x2.pdf [file hdy201248x2.pdf]

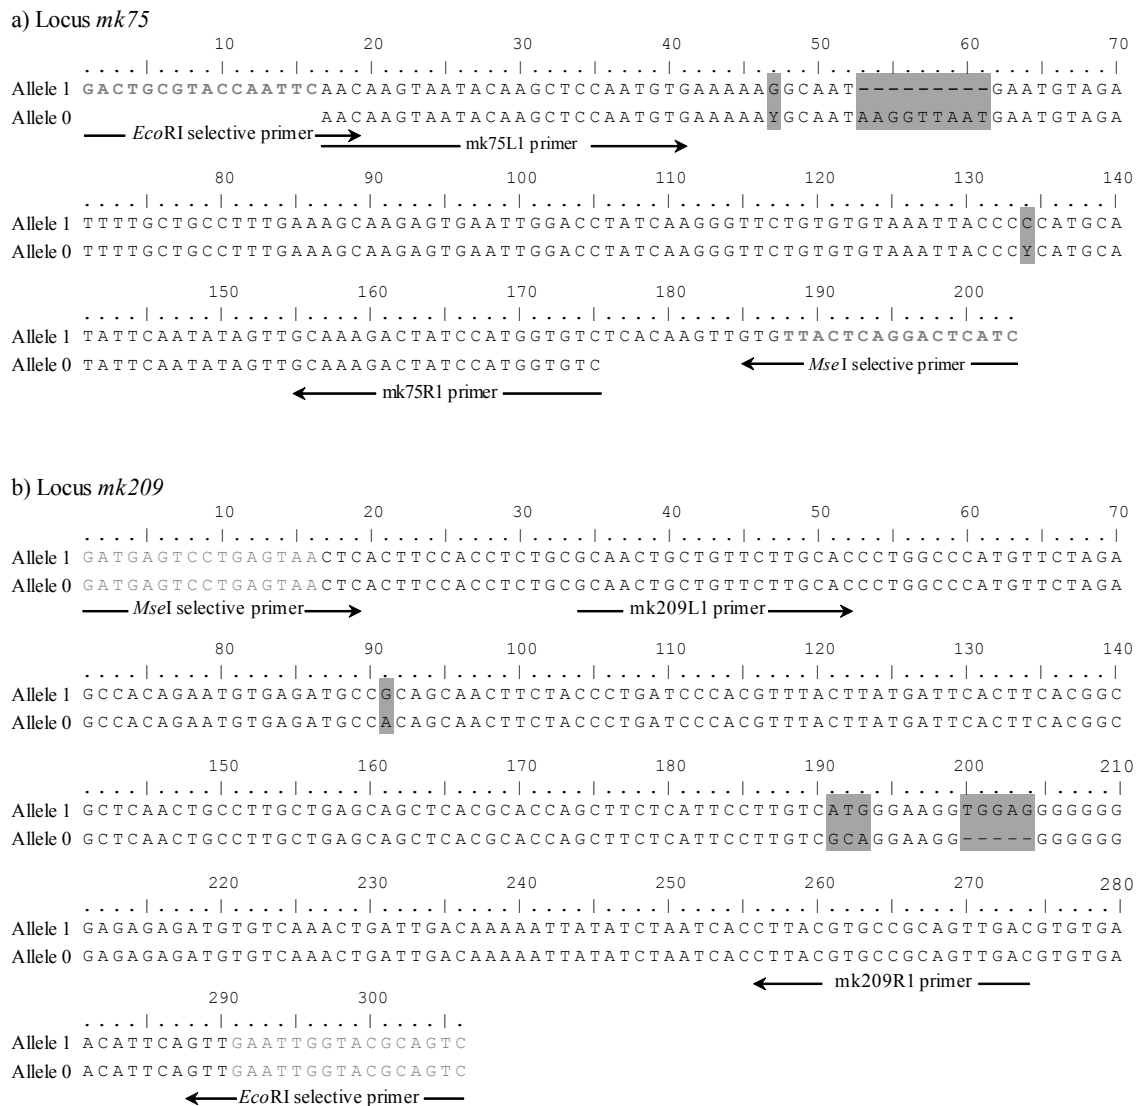

**Figure S1** Alignment of sequences from a dominant allele (allele 1), corresponding to the AFLP band scored as present, with a recessive allele (allele 0), corresponding to the absence of the AFLP band. Sequence alignments for five AFLP outliers are represented (a-e). For each locus, the allele 1 was retrieved by clone sequence from a sample with the AFLP band present, while the allele 0 was obtained by direct PCR from digested DNA from a different sample with the AFLP band absent (homozygous recessive), using a combination of AFLP selective primers with outlier-specific internal primers. Indels and SNPs are highlighted in grey shades. The binding sites of *MseI* and *EcoRI* selective primers and of outlier-specific primers are indicated with arrows.
