# Supplementary material
Source: PubMed Central journal article supplement (PMC3499840)
Supplement: hdy201248x3.pdf [file hdy201248x3.pdf]

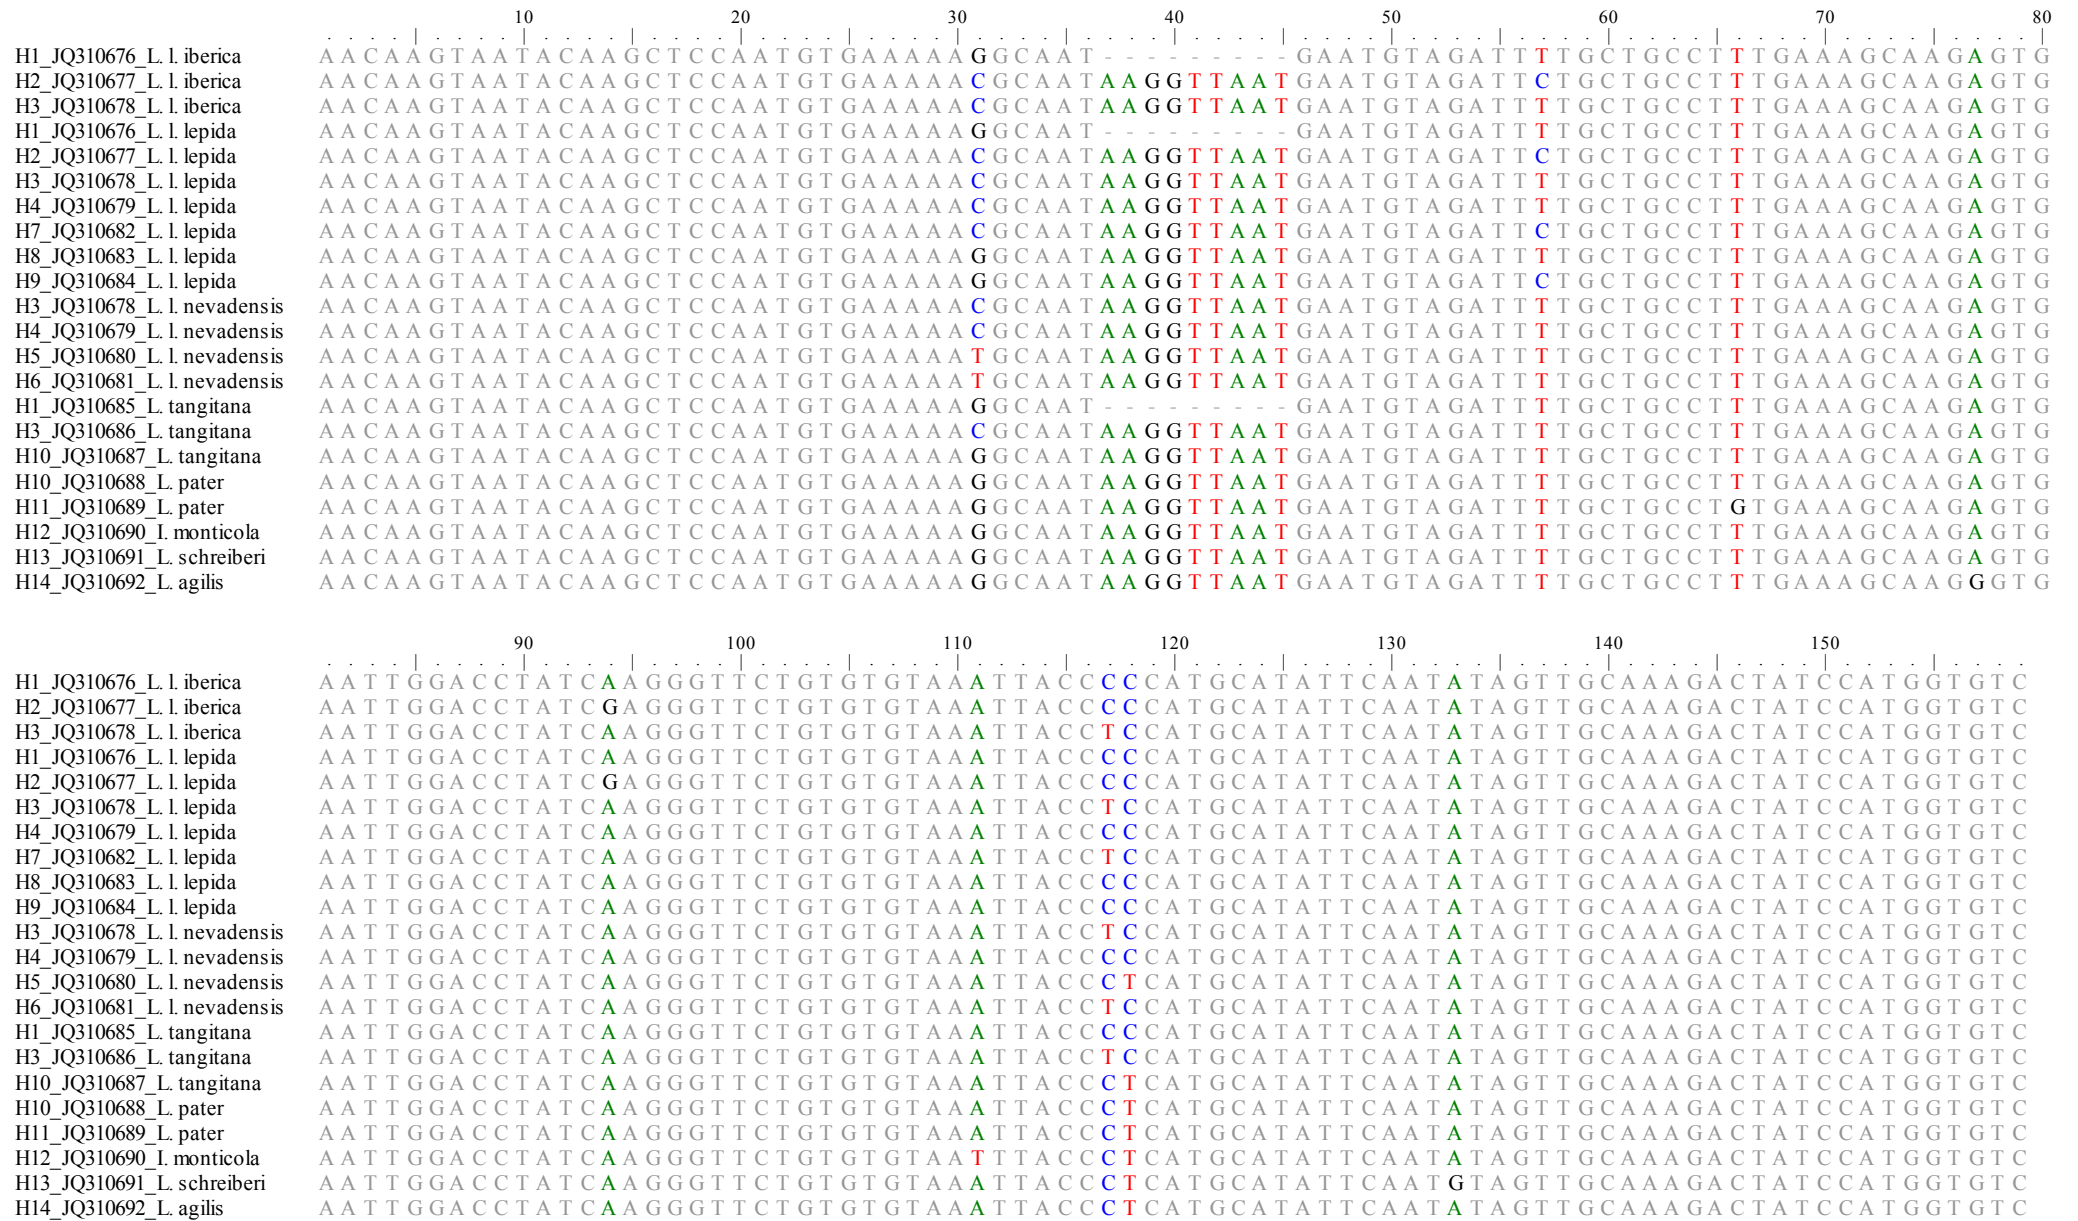

**Figure S2** Sequence alignment from haplotypes (H1-H14) detected in locus *mk75* in each lizard species or subspecies. The accession number corresponding to each haplotype is indicated. Conserved bases are presented in grey while variable sites are highlighted with colored font. Dashes denote gaps.
