# Supplementary material
Source: PubMed Central journal article supplement (PMC3499840)
Supplement: hdy201248x5.pdf [file hdy201248x5.pdf]

|                              | 10                                              | 20                                      | 30                                                                      | 40 | 50 | 60 | 70 | 80 |
|------------------------------|-------------------------------------------------|-----------------------------------------|-------------------------------------------------------------------------|----|----|----|----|----|
| H1_JQ310712_L. l. lepida     | T T T G A A G G A G T G G G A G A A G G G G G G | - A C A T G A T T G A G G G A A C T T T | C A G A T T T A C A T A C A G A T A A G C C C T A A T G C A G T G G T T |    |    |    |    |    |
| H2_JQ310713_L. l. lepida     | T T T G A A G G A G T G G G A G A A G G G G G G | - A C A T G A T T G A G G G A A C T T C | C A G A T T T A C A T A C A G A T A A G C C C T A A T G C A G T G G T T |    |    |    |    |    |
| H3_JQ310714_L. l. lepida     | T T T G A A G G A G T G G G A G A A G G G G G G | - A C A T G A T T G A G G G A A C T T T | C A G A T T T A C A T A C A G A T A A G C C C T A A T G C A G T G G T T |    |    |    |    |    |
| H4_JQ310715_L. l. lepida     | T T T G A A G G A G T G G G A G A A G G G G G G | - A C A T G A T T G A G G G A A C T T T | C A G A T T T A C A T A C A G A T A A G C C C T A A T G C A G T G G T T |    |    |    |    |    |
| H5_JQ310716_L. l. lepida     | T T T G A A G G A G T G G G A G A A G G G G G G | - A C A T G A T T G A G G G A A C T T T | C A G A T T T A C A T A C A G A T A A G C C C T A A T G C A G T G G T T |    |    |    |    |    |
| H8_JQ310719_L. l. lepida     | T T T G A A G G A G T G G G A G A A G G G G G G | - A C A T G A T T G A G G G A A C T T C | C A G A T T T A C A T A C A G A T A A G C C C T A A T G C A G T G G T T |    |    |    |    |    |
| H8_JQ310719_L. l. iberica    | T T T G A A G G A G T G G G A G A A G G G G G G | - A C A T G A T T G A G G G A A C T T C | C A G A T T T A C A T A C A G A T A A G C C C T A A T G C A G T G G T T |    |    |    |    |    |
| H6_JQ310717_L. l. nevadensis | T T T G A A G G A G T G G G A G A A G G G G G A | - A C A T G A T T G A G G G A A C T T C | C A G A T T T A C A T A C A G A T A A G C C C T A A T G C A G T G G T T |    |    |    |    |    |
| H7_JQ310718_L. l. nevadensis | T T T G A A G G A G T G G G A G A A G G G G G G | - A C A T G A T T G A G G G A A C T T C | C A G A T T T A C A T A C A G A T A A G C C C T A A T G C A G T G G T T |    |    |    |    |    |
| H8_JQ310719_L. l. nevadensis | T T T G A A G G A G T G G G A G A A G G G G G G | - A C A T G A T T G A G G G A A C T T C | C A G A T T T A C A T A C A G A T A A G C C C T A A T G C A G T G G T T |    |    |    |    |    |
| H9_JQ310720_L. l. nevadensis | T T T G A A G G A G T G G G A G A A G G G G G G | G A C A T G A T T G A G G G A A C T T C | C A G A T T T A C A T A C A G A T A A G C C C T A A T G C A G T G G T T |    |    |    |    |    |
| H2_JQ310725_L. tangitana     | T T T G A A G G A G T G G G A G A A G G G G G G | - A C A T G A T T G A G G G A A C T T C | C A G A T T T A C A T A C A G A T A A G C C C T A A T G C A G T G G T T |    |    |    |    |    |
| H8_JQ310722_L. tangitana     | T T T G A A G G A G T G G G A G A A G G G G G G | - A C A T G A T T G A G G G A A C T T C | C A G A T T T A C A T A C A G A T A A G C C C T A A T G C A G T G G T T |    |    |    |    |    |
| H10_JQ310721_L. tangitana    | T T T G A A G G A G T G G G A G A A G G A G G G | - A C A T G A T T G A G G G A A C T T C | C A G A T T T A C A T A C A G A T A A G C C C T A A T G C A G T G G T T |    |    |    |    |    |
| H12_JQ310723_L. tangitana    | T T T G A A G G A G T G G G A G A A G G G G G G | G A C A T G A T T G A G G G A A C T T C | C A G A T T T A C A T A C A G A T A A G C C C T A A T G C A G T G G T T |    |    |    |    |    |
| H13_JQ310724_L. tangitana    | T T T G A A G G A G T G G G A G A A G G A G G G | - A C A T G A T T G A G G G A A C T T C | C A G A T T T A C A T A C A G A T A A G C C C T A A T G C A G T G G T T |    |    |    |    |    |
| H15_JQ310726_L. pater        | T T T G A A G G A G T G G G A G A A G G G G G G | - A C A T G A T T G A G G G A A C T T C | C A G A T T T A C A T G C A G A T A A G C C C T A A T G C A G T G G T T |    |    |    |    |    |
| H16_JQ310727_L. pater        | T T T G A A G G A G T G G G A G A A G G G G G G | - A C A T G A T T G A G G G A A C T T C | C A G A T T T A C A T G C A G A T A A G C C C T A A T G C A G T G G T T |    |    |    |    |    |
| H17_JQ310728_L. pater        | T T T G A A G G A G T G G G A G A A G G G G G G | - A C A T G A T T G A G G G A A C T T C | C A G A T T T A C A T G C A G A T A A G C C C T A A T G C A G T G G T T |    |    |    |    |    |
| H18_JQ310729_L. pater        | T T T G A A G G A G T G G G A G A A G G G G G G | - A C A T G A T T G A G G G A A C T T C | C A G A T T T A C A T G C A G A T A A G C C C T A A T G C A G T G G T T |    |    |    |    |    |
| H19_JQ310730_L. schreiberi   | T T T G A A G G A G T G G G A G A A G G G G G G | G A C A T G A T T G A G G G A A C T T C | C A G A T T T A C A T A C A G A T A A G C C C T A A T G C A G T G G T T |    |    |    |    |    |
| H20_JQ310731_I. monticola    | T T T G A A G G A G T G G G A G A A G G G - - - | - A C A T G A T T G A G G G A A C T T C | C A G A T T T A C A T G C A G A T A A G C C C T A A T G C A G T G G T T |    |    |    |    |    |
| H21_JQ310732_L. agilis       | T T T G A A G G A G T G G G A G A A G G G G G G | - A C A T G A T T G A G G G A A C T T C | C A G A T T T A C A T A C A G A T G A G C C C T A A T G C A G T G G T T |    |    |    |    |    |

**Figure S4** Sequence alignment from haplotypes (H1-H21) detected in locus *mk245* in each lizard species or subspecies. The accession number corresponding to each haplotype is indicated. Conserved bases are presented in grey while variable sites are highlighted with colored font. Dashes denote gaps. A microsatellite composed by six to ten GTT units is present at positions 168-197.
