# Supplementary material
Source: PubMed Central journal article supplement (PMC3499840)
Supplement: hdy201248x6.pdf [file hdy201248x6.pdf]

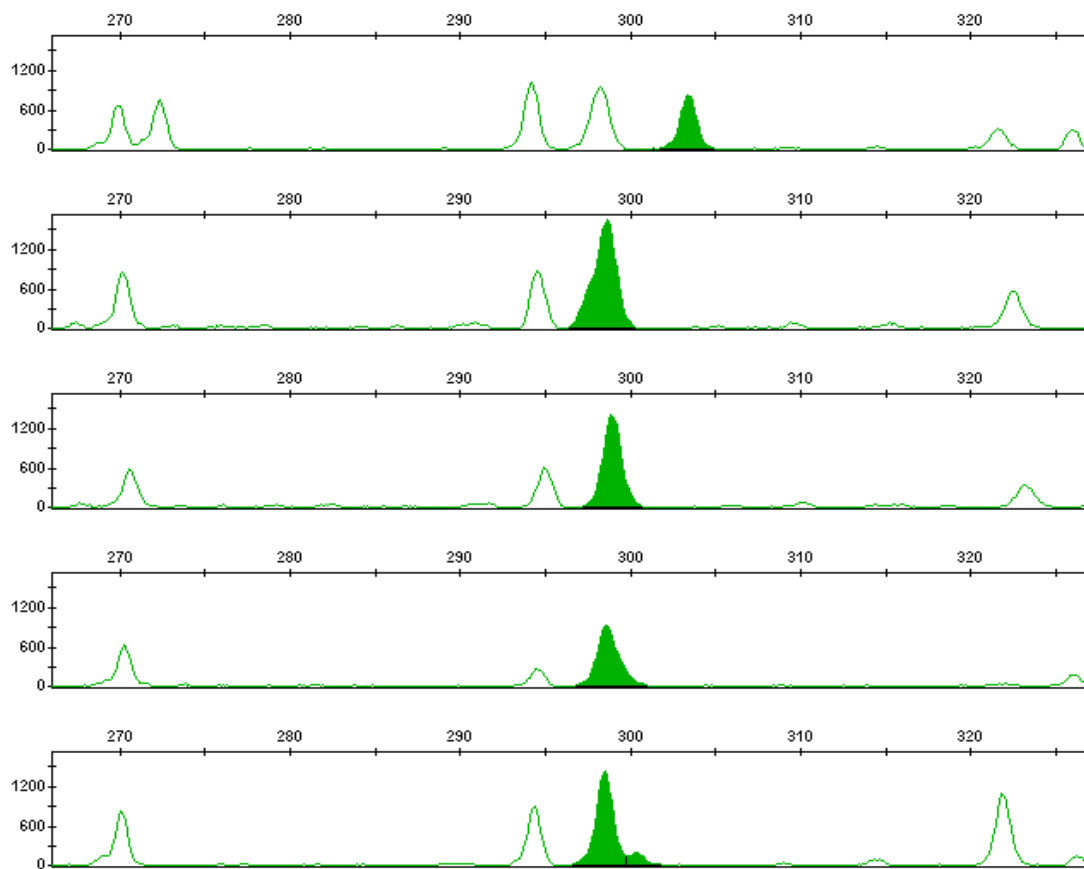

**Figure S5-** AFLP profile caption from GeneMapper of five samples sequenced for locus *mk209*. The peak scored as *mk209* (dominant allele) had 303 base pairs (bp) and is shaded in green on the first row sample, but absent from all other four samples. Shaded peaks on rows two to five correspond to the expected size of *mk209* recessive alleles found by sequencing: two alleles on the second row, with 297 and 298 bp; two alleles with 298 bp on the third row; two alleles on the fourth row with 298 and 299 bp; two alleles on the fifth row with 298 and 300 bp. AFLP band with 298 bp was present in all samples in the genome scan and therefore was not considered as a polymorphic fragment. Most recessive alleles from *mk209* seemed to have co-migrated with another homoplasious fragment with 298 bp.
